# Supplementary material for: Atroxlysin-III, A Metalloproteinase from the Venom of the Peruvian Pit Viper Snake Bothrops atrox (Jergón) Induces Glycoprotein VI Shedding and Impairs Platelet Function
Source: PubMed Central journal article supplement (PMC6803841; doi:10.3390/molecules24193489), 2019-09-26
Supplement: molecules-24-03489-s001.pdf [file molecules-24-03489-s001.pdf]

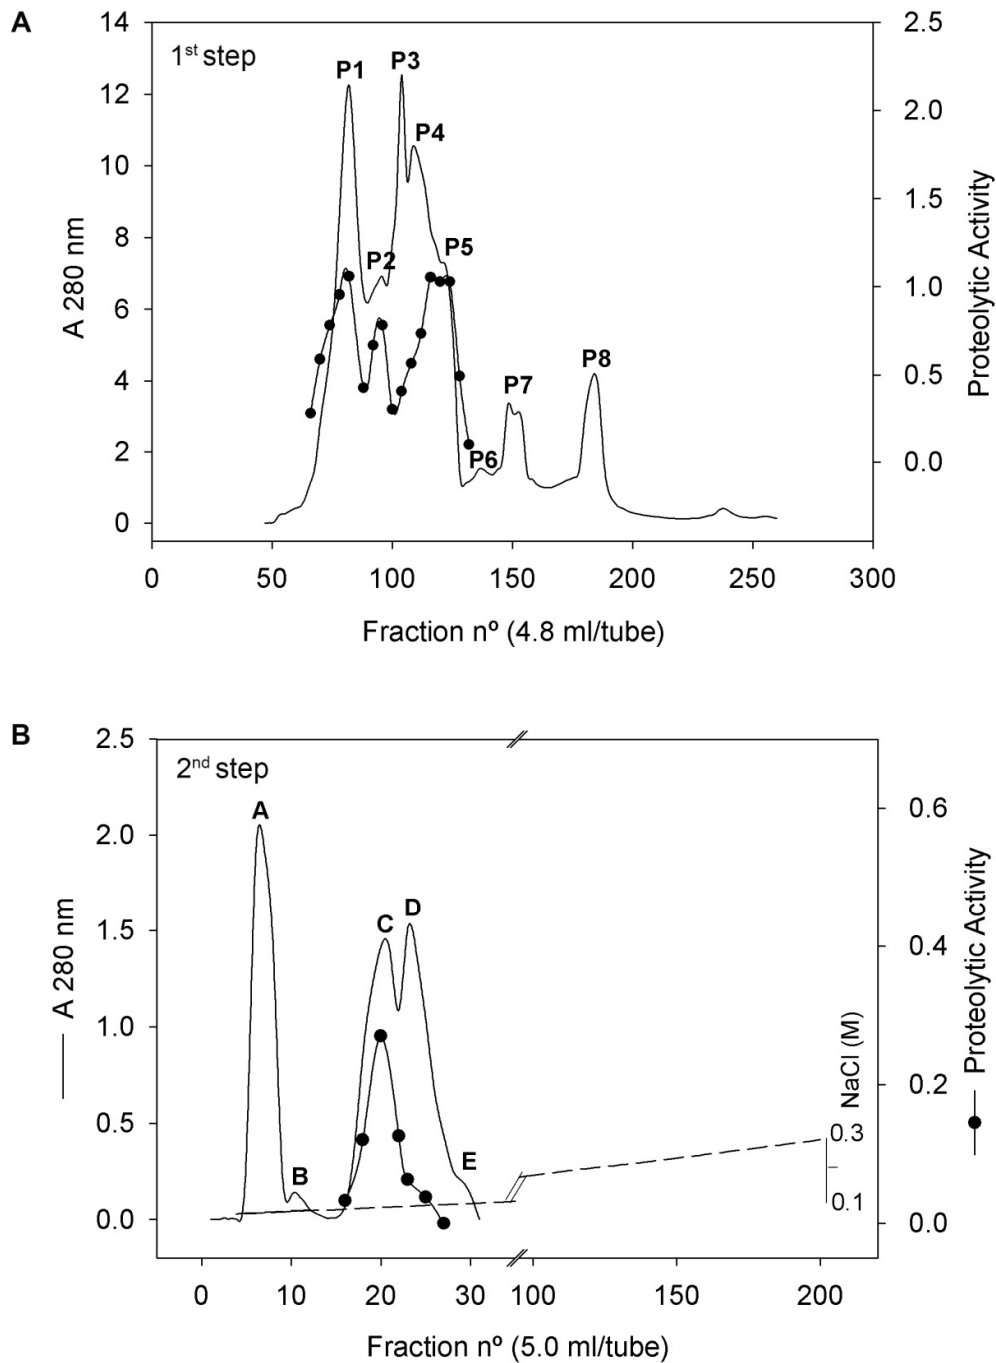

**Figure 1.** Purification of Atroxlysin-III from *B. atrox* venom. **(A)** Crude venom of *B. atrox* was applied to a Sephacryl 200 column. The column was equilibrated and eluted with 50 mM ammonium acetate buffer, pH 7.5, containing 0.3 M NaCl at a flow rate of 7.2 mL/h. The peak P1 (with proteolytic and hemorrhagic activity) was applied to a DEAE-ion exchange column. **(B)** The DEAE Sepharose CL-6B column was equilibrated with 50 mM Tris-HCl buffer, pH 8.0, and eluted with a linear salt gradient from 0–0.3 M NaCl at a flow rate of 13 mL/h. Peak C contained the hemorrhagic and proteolytic activity.

aagagattgcctggcttccagccaaatccagcctccaaaatgattcatgttctcttggtc  
K R L P G F Q P N P A S K M I H V L L V  
actatatgcttagcagcttttcttatcaagggagctctataatcctggaatctgggaac  
T I C L A A F P Y Q G S S I I L E S G N  
gtgaatgattatgaagtagtgtatccacgaaaagtcactgcattgcccaggagcaatt  
V N D Y E V V Y P R K V T A L P K G A I  
caaccaagtatgaagacacccatgcaatgaatttaagtgatggagagccagtggtc  
Q P K Y E D T M Q Y E F K V N G E P V V  
cttcacctggaaaaataaaggactttttcaaaagattacagcgagattcattattcc  
L H L E K N K G L F S K D Y S E I H Y S  
cctgatggcagaaaaattacaacatacccccggttgaggatcactgctattatcatgga  
P D G R K I T T Y P P V E D H C Y Y H G  
cccatcaagaatgatgctgactcaactgcaagcatcaatgcatgctacggtttgaaagga  
P I K N D A D S T A S I N A C Y G L K G  
tatttcaagcttcaaagggacacgtactttattgaacccttgaagcttccccgacagtgaa  
Y F K L Q R D T Y F I E P L K L P D S E  
gcccatgcagcttcaaatatgaaaatgtagaaaaggaggatgaggcccccaaatgtgt  
A H A V F K Y E N V E K E D E A P K M C  
gggtaaccagaattggaaatcatatgaacctcaaaaaggcctctcatttagctttt  
G V T Q N W K S Y E P I K K A S H L A F  
actgctgaacaacaaaaatataacccttcagatacgttgagtttctcttagttgtggac  
T A E Q Q K Y N P F R Y V E F L L V V D  
caaggaatgctcacaaaaacaatggcgattttaaataaaaataaatcaagaatgtctgaa  
Q G M L T K N N G D L N K I K S R M S E  
cttgccaaaattgtgaatgagattttaaagatacctgtatttgcagctgcactggttggc  
L A K I V N E I L R Y L Y L H A A L V G  
ctacaaatttggaccaatggagataagattaccgtgaagccggacgtggattatactttg  
L Q I W T N G D K I T V K P D V D Y T L  
aattcatttgcagaatggagaaaaacagatttgcagctcgaaaaaacatgataatgt  
N S F A E W R K T D L L T R K K H D N A  
cagttactcacagcaattgacttcaatggaccaactataggatagcttacataggcagc  
Q L L T A I D F N G P T I G Y A Y I G S  
atgtgccacccgaagcgttctgtagcaattgttcaggattatagcccaataaatctgtg  
M C H P K R S V A I V Q D Y S P I N L V  
gttgctgttataatggcccatgagatgggtcataatctgggcattcatcatgacacagat  
V A V I M A H E M G H N L G I H H D T D  
ttctgttcttgtggtgattacccatgcattatgggtcccacgataagcaatgaaccttcg  
F C S C G D Y P C I M G P T I S N E P S  
aaatcttccagcaattgtagttatatccaatggtggactttattatgaaggacaacca  
K F F S N C S Y I Q C W D F I M K D N P  
caatgcattatcaatgaacccttgggaacagatattgtttcacctccagtttgtggaat  
Q C I I N E P L G T D I V S P P V C G N  
gaacttttggaggtgggagaagaatgtgactgtggcactcctgaaaattgtcaaatgag  
E L L E V G E E C D C G T P E N C Q N E  
tgctgcatgctgcaacgtgtaactgaaatcagggtcacagtggtggacatggagactgt  
C C D A A T C K L K S G S Q C G H G D C  
tgtgagcaatgcaaatttagcaaatcaggaacagaatgccgggcatcaatgagtgaaatgt  
C E Q C K F S K S G T E C R A S M S E C  
gaccgggtgaacactgcactggccaatcttctgagtgctcctgcagatgtcttccataag  
D P A E H C T G Q S S E C P A D V F H K  
aatggacaaccatgcctagataactacggttactgctacaatgggaattgccccatcatg  
N G Q P C L D N Y G Y C Y N G N C P I M  
tataccaatggtatgctctcttgggtgagatgtttatgaggctgaagattcatgcttc  
Y H Q C Y A L F G A D V Y E A E D S C F  
aaagataaccagaaaggcaattattatggctactgcagaaaggaaaatggtaaaaagatt  
K D N Q K G N Y Y G Y C R K E N G K K I

```

ccatgtgcaccagaagatgtaaaatgtggcaggttataactgcaaagataattcacctgga
P C A P E D V K C G R L Y C K D N S P G
caaaataatccttgcaagatgttctattccaacgatgatgaacataaggggaatggttctt
Q N N P C K M F Y S N D D E H K G M V L
cctggaacaaaatgtgcagatggaaagggtgtgcagcaacgggcattgtggtgatgtggct
P G T K C A D G K V C S N G H C V D V A
acagcctactagtcaacctctggctttgattttggagatcctcctccagaagggttggc
T A Y *
ttctctcaagtccaaagagatccatctgcctgcattcttactagtaaatacactccttagctt
ccagatggcatctaaattctgcaatattcttccaccatatttaactctggttaccttttgc
tgtaatcaaaccttttccccaccacaaagctccatgggcatgtacaacaccaaaggctta
tttgctgtcaagaaaaaaaaatggccattttataaccgtttgccaattgcagagcacattt
aatacaagaagttctgccttttgagctggtgtattcgaagtcaatgcttcctctccaaa
atthttgtgctggctttccaaaatgtagctacttccatcaataa

```

**Figure 2.** The nucleotide and deduced amino acid sequence of Atr-III precursor from *B. atrox* venom. The predicted amino acid sequence is shown above the nucleotide sequence: sequence starts with the amino terminal amino acid of mature protein (glutamic acid). A signal peptide (MIHVLLVTICLAAFPYQG), a cysteine-switch motif (PKMCGV) are bold-underlined. The Zinc binding motif (HEGNHLGIHHD) and the methionine 168 of the Met-turn region are invariant and are highlighted in blue. Putative N-linked glycosylation site is bold and boxed in yellow. Disintegrin-like (ECD) sequences are highlighted in green. Termination codon and polyadenylation addition signal (aataa) are denoted. Accession number of Atroxlysin-III precursor in the GenBank database is KX821773.

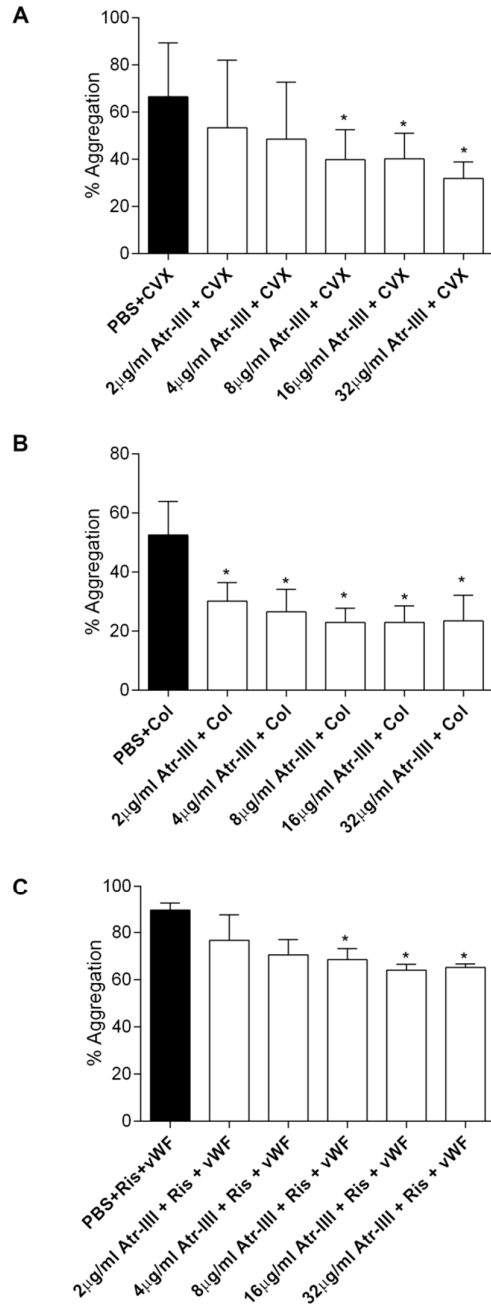

**Figure S3:** Washed human platelets (225  $\mu$ L,  $2.5 \times 10^5/\mu$ L) were pre-incubated with different concentrations of Atr-III: 2 to 32  $\mu$ g/mL for 3 minutes and stirred (600 rpm) at 37  $^{\circ}$ C. After incubation, platelets were stimulated with different agonists: (A) 6  $\mu$ g/mL of convulxin (CVX), (B) 10  $\mu$ g/mL of collagen-I, (C) 5  $\mu$ g/mL of human vWF plus 0.5mg/mL of ristocetin. Black bars represent the positive control (platelets pre-incubated with 10  $\mu$ L PBS). \* $P < 0.05$  compared with PBS plus agonist (1-way ANOVA followed by Tukey's test  $n = 4$ ).
